# Supplementary material for: Physicochemical and biological characterization of chitosan-microRNA nanocomplexes for gene delivery to MCF-7 breast cancer cells
Source: PubMed Central journal article supplement (PMC4555168; doi:10.1038/srep13567), 2015-09-01
Supplement: srep13567-s1.pdf [file srep13567-s1.pdf]

**Physicochemical and biological characterization of chitosan-microRNA nanocomplexes  
for gene delivery to MCF-7 breast cancer cells**

Santos-Carballal B.<sup>1</sup>, Aldering L.J.<sup>1</sup>, Ritzefeld M.<sup>2</sup>, Pereira S.<sup>1</sup>, Sewald N.<sup>2</sup>, Moerschbacher  
B.M.<sup>1</sup>, Götte M.<sup>3\*</sup>, Goycoolea F.M.<sup>1\*</sup>

<sup>1</sup> Institute of Plant Biology and Biotechnology (IBBP), University of Münster, Schlossgarten  
3, D-48149 Münster, Germany

<sup>2</sup> Organic and Bioorganic Chemistry, Bielefeld University, Universitaetsstrasse 25, D-33615  
Bielefeld, Germany

<sup>3</sup> Department of Gynecology and Obstetrics, University of Münster, Albert-Schweitzer-  
Campus 1, D-48149 Münster, Germany

Corresponding authors:

Martin Götte (mgotte@uni-muenster.de) Fax: +49 251 83-55928

Francisco M. Goycoolea (goycoole@uni-muenster.de) Fax: +49 251 83-28371

Present address Markus Ritzefeld: Department of Chemistry, Imperial College London, South  
Kensington Campus, SW7 2AZ, London, UK

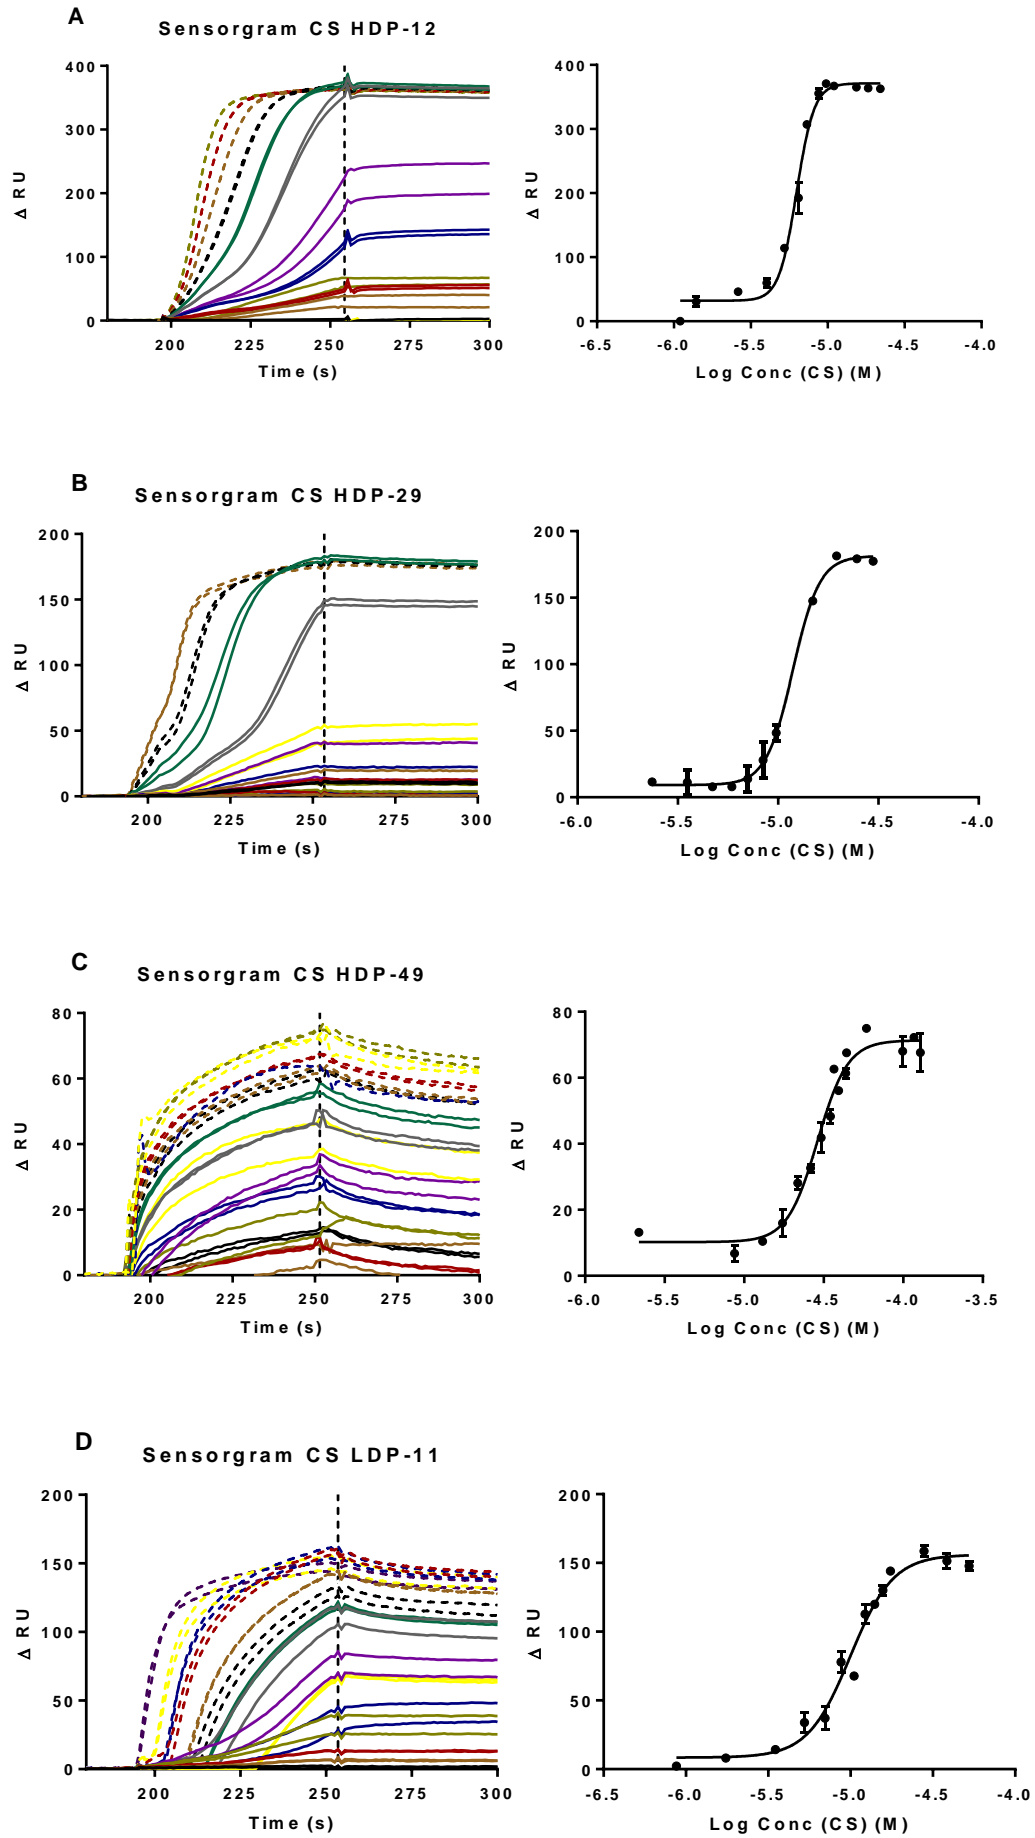

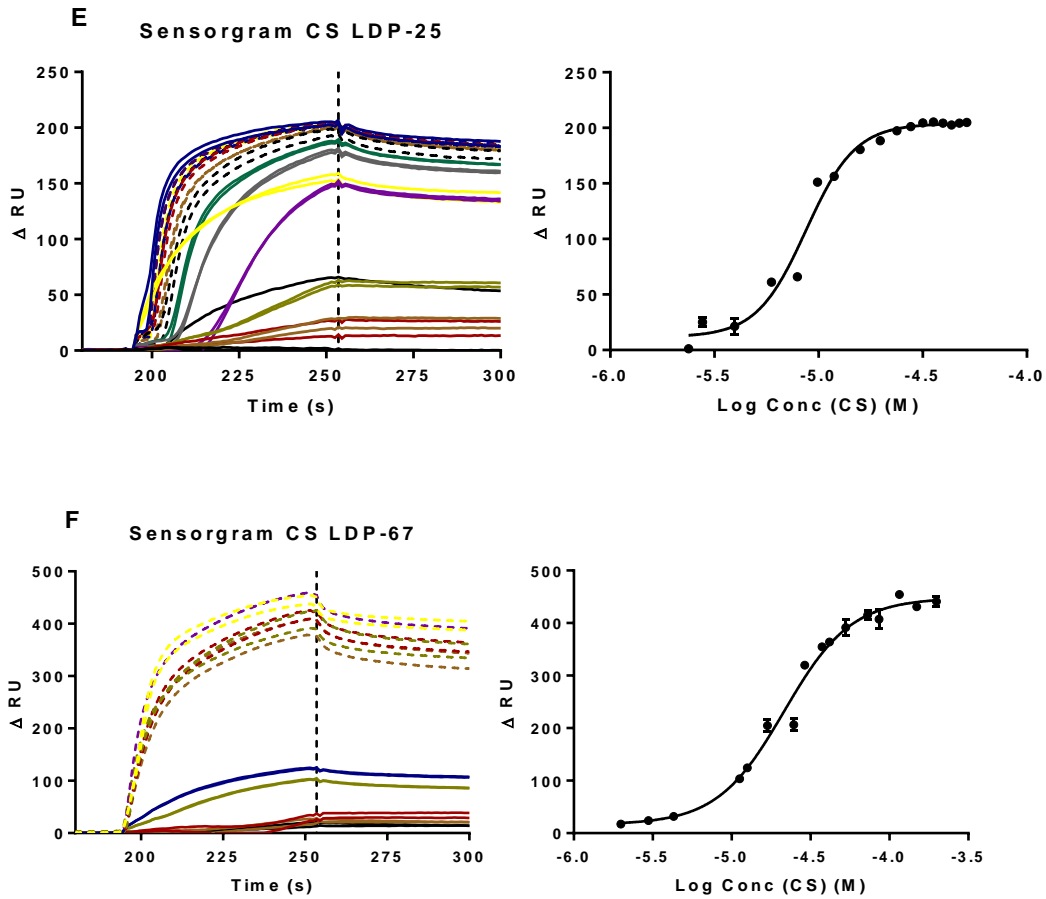

**S1.** Sensorgrams of different chitosans interacting with hsa-miR-5p on streptavidin sensor chip. Binding was analyzed in acetate buffer (pH=5.1) containing 10mM NaCl. Increasing concentrations of chitosan were injected over the surfaces for 20 s at 20  $\mu$ L/min until the surface was saturated.

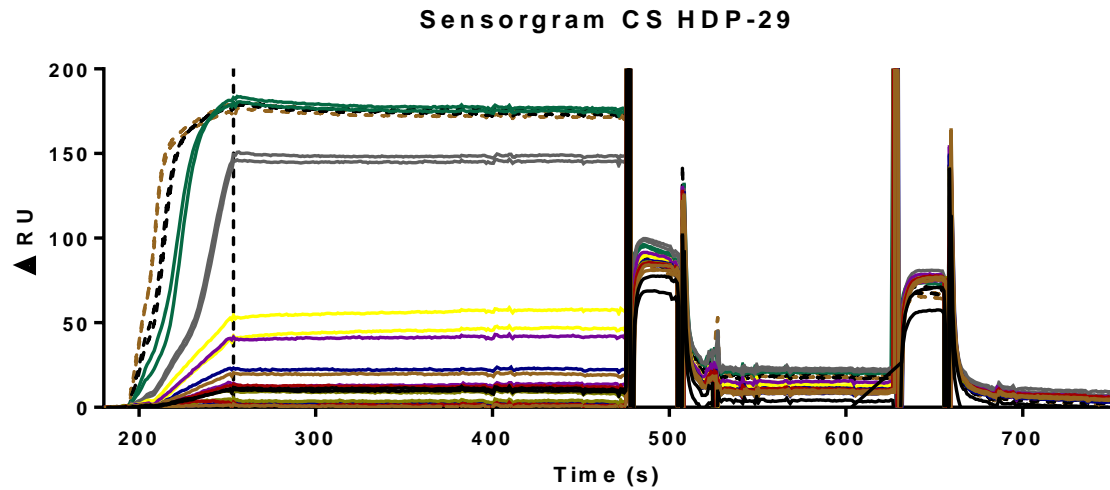

**S2.** Complete sensorgram with regeneration phases of CS HDP-29 interacting with hsa-miR-5p on streptavidin sensor chip. Binding was analyzed in acetate buffer (pH=5.1) containing 10mM NaCl. Increasing concentrations of chitosan were injected over the surfaces for 20 s at 20  $\mu$ L/min until the surface was saturated.
